# Supplementary material for: Combination of a fusogenic glycoprotein, pro-drug activation and oncolytic HSV as an intravesical therapy for superficial bladder cancer
Source: PubMed Central journal article supplement (PMC3273343; doi:10.1038/bjc.2011.577), 2012-01-12

# Supplementary Figure 1

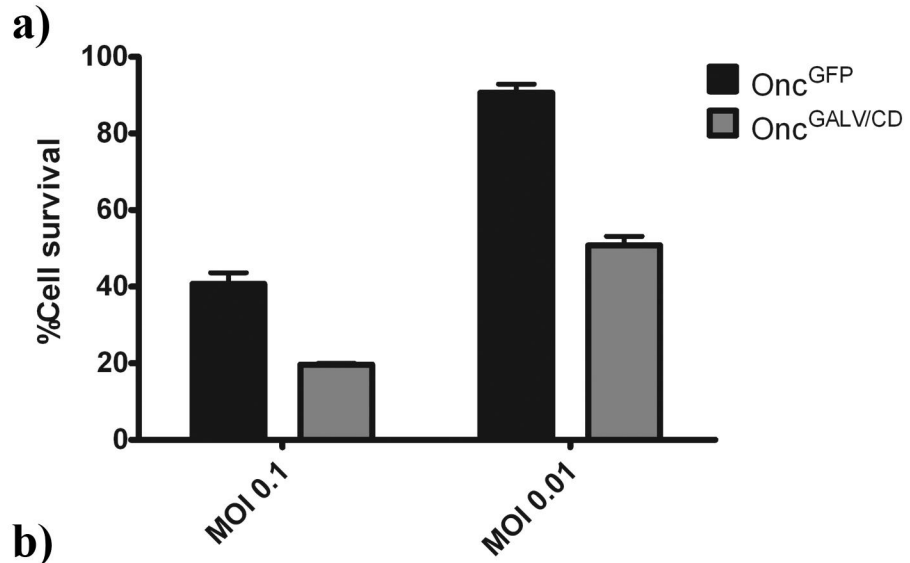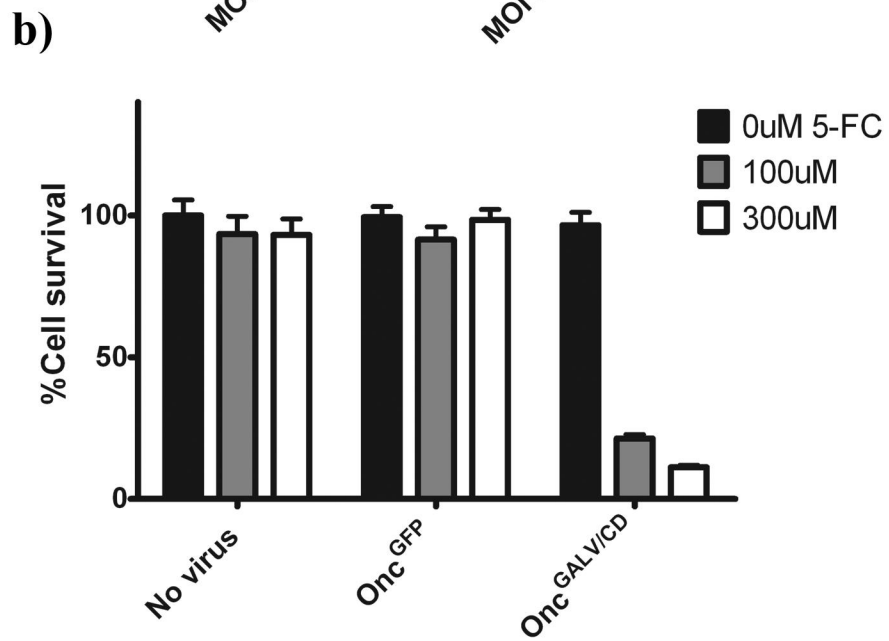

Supplement: bjc2011577x1.pdf [file bjc2011577x1.pdf]
